# Supplementary material
Source: publisher figshare collection journal article supplement (https://acs.figshare.com/ndownloader/files/4612780)
Supplement: Supplementary file 1 [file 4612780]

## Supporting Information

**Figure S1.** Ir L<sub>III</sub>-edge XANES spectra for (Ir<sup>3+</sup>)<sub>40</sub>G4OH complex and IrCl<sub>3</sub> aqueous solutions before and after reduction with NaBH<sub>4</sub>.

**Figure S2.** CO adsorption after a) H<sub>2</sub> at different temperatures, b) H<sub>2</sub> at 400 °C for different times.

**Figure S3.** HRTEM micrographs and particle size distribution histograms of 1 wt.% a) Ir<sub>40</sub>G4OH/ $\gamma$ -Al<sub>2</sub>O<sub>3</sub>, b) Ir/ $\gamma$ -Al<sub>2</sub>O<sub>3</sub> treated with reduction treatment and c) Ir<sub>40</sub>G4OH/ $\gamma$ -Al<sub>2</sub>O<sub>3</sub>, d) Ir/ $\gamma$ -Al<sub>2</sub>O<sub>3</sub> treated with oxidation/reduction treatment.

**Figure S4.** Typical benzonitrile concentration versus time plot obtained for the hydrogenation of benzonitrile over supported Ir catalysts.

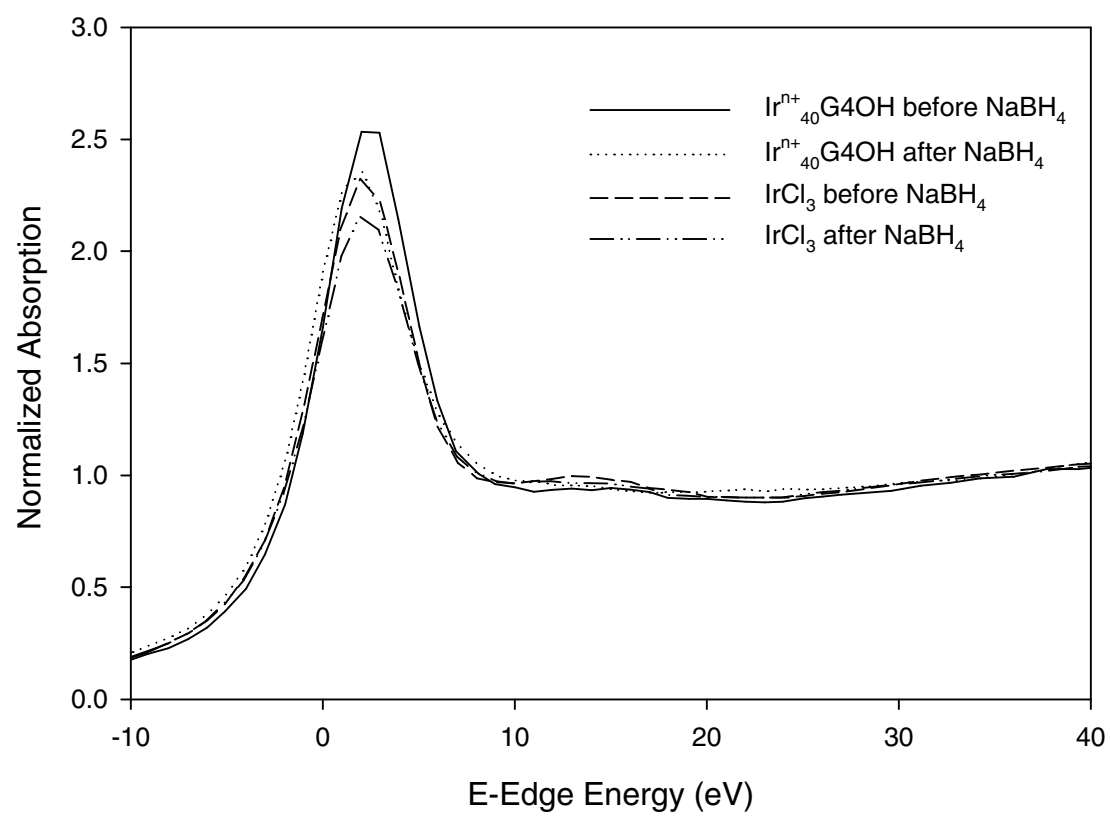

**Figure S1.**



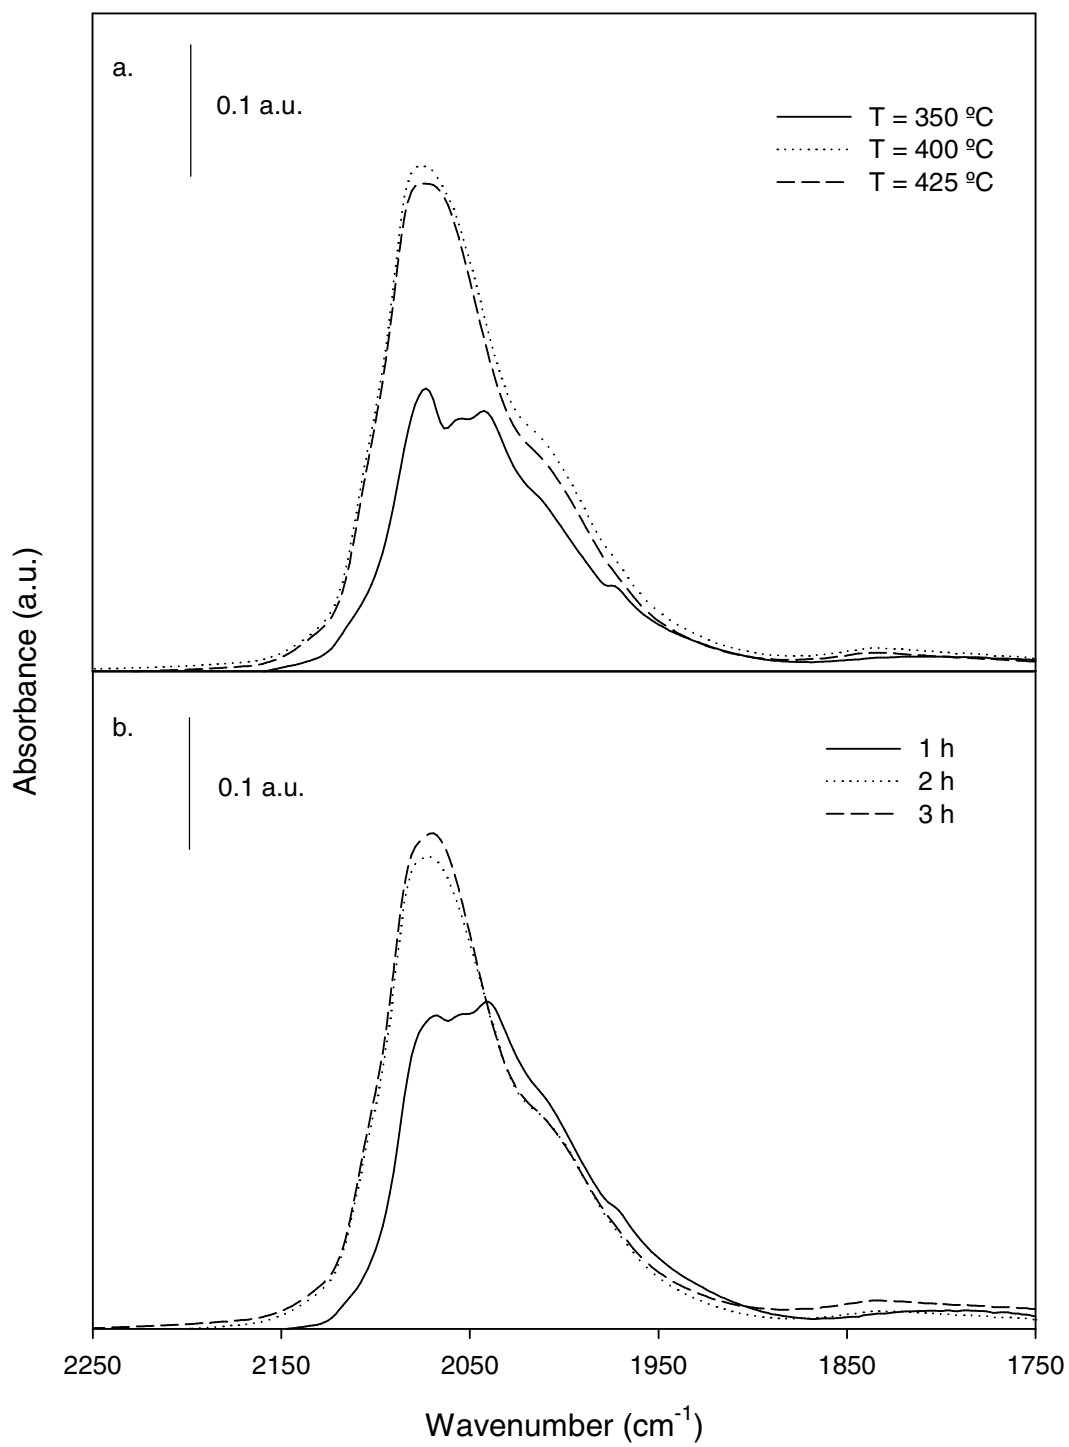

**Figure S2.**

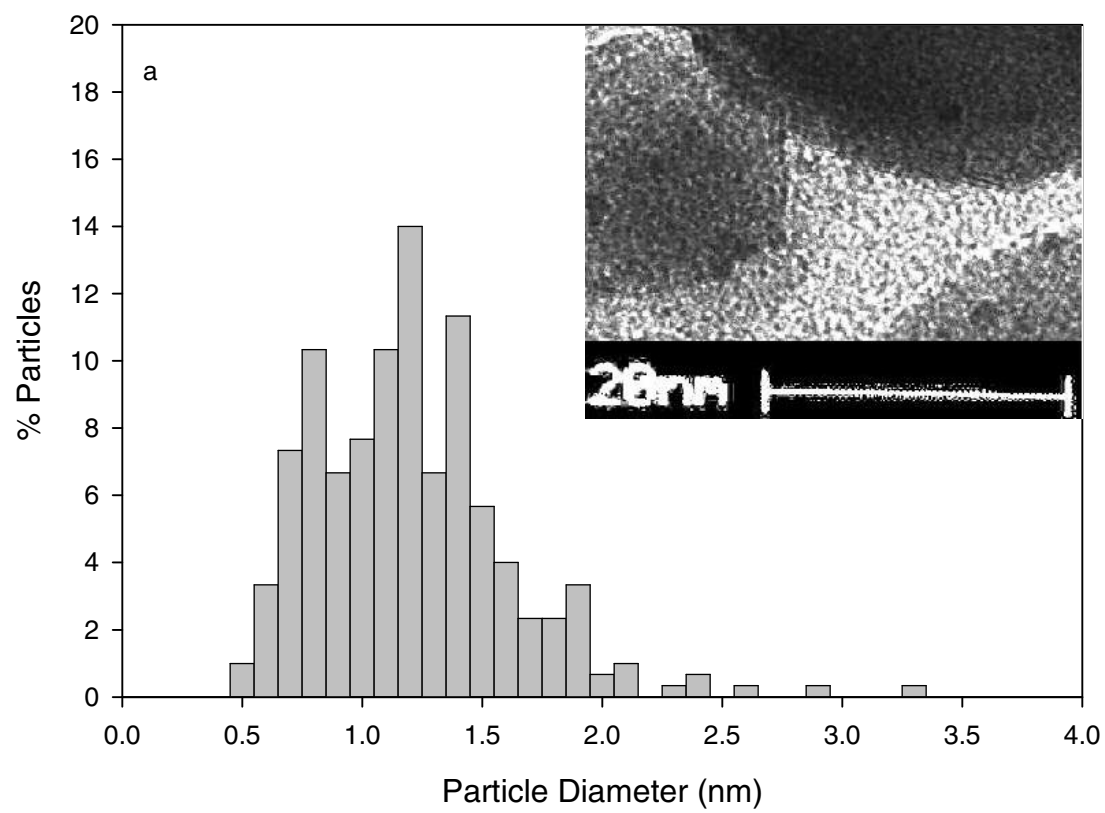

**Figure S3.**

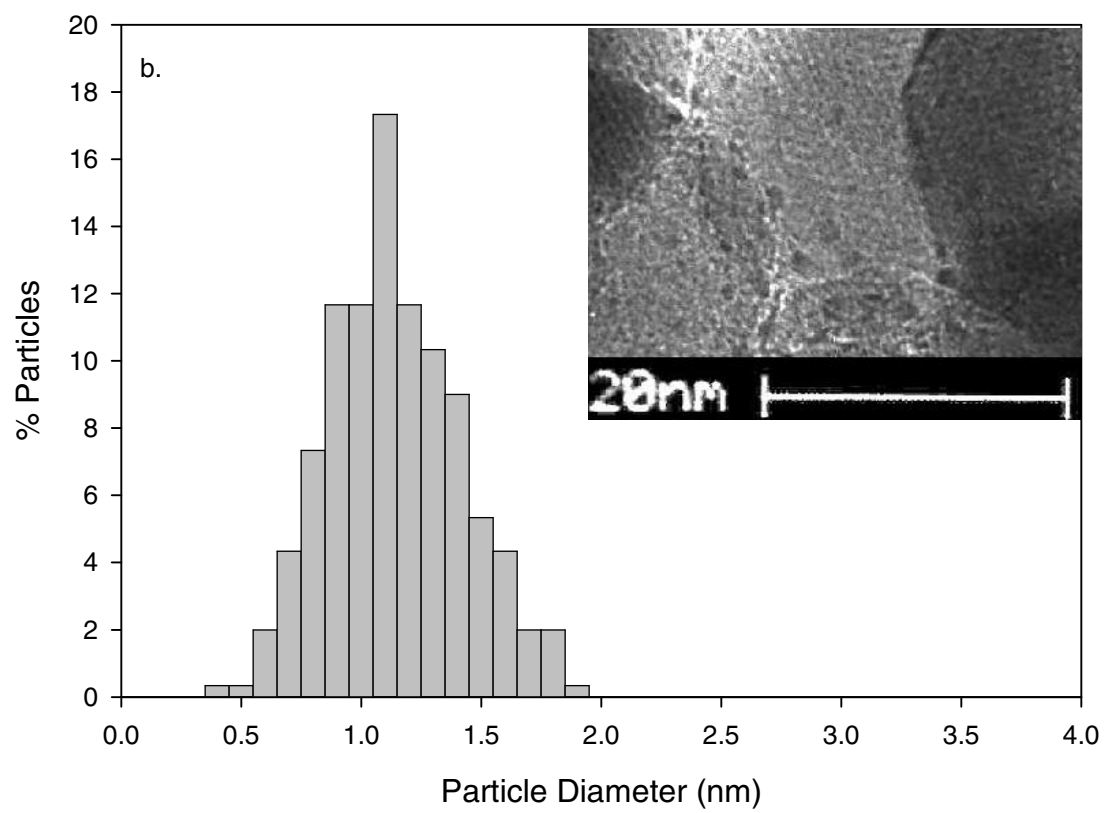

**Figure S3. (cont.)**

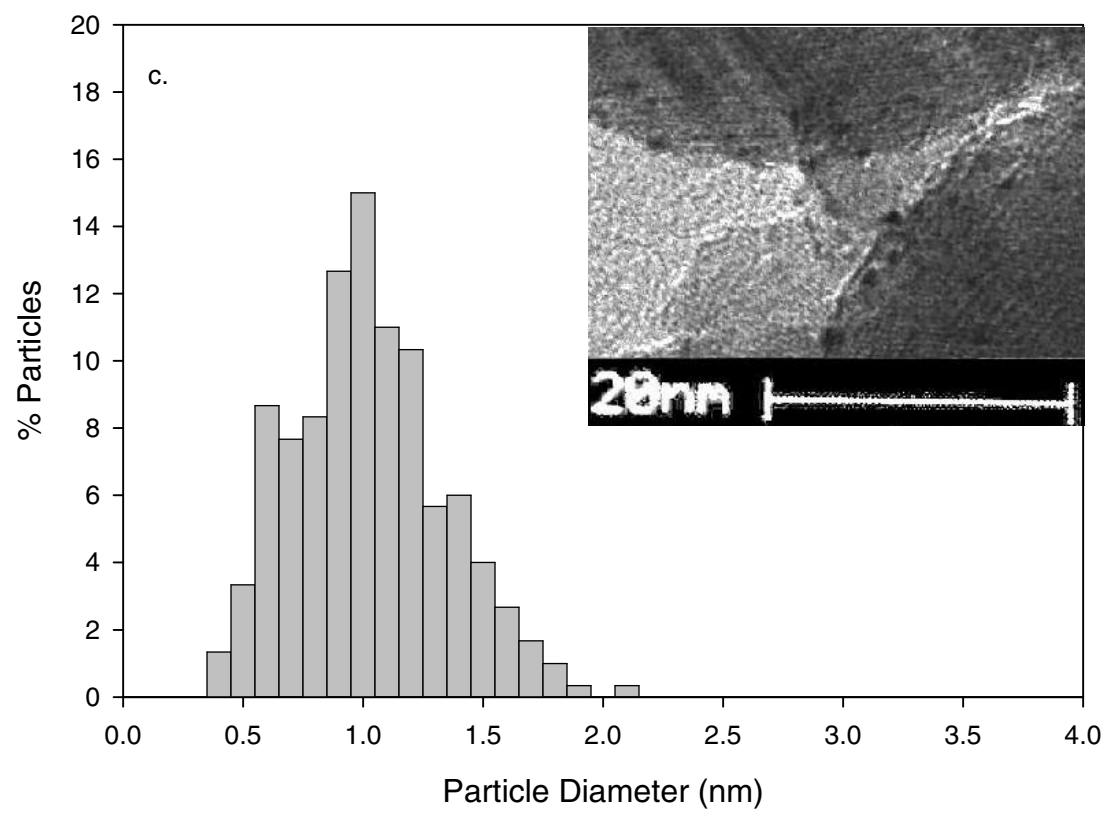

**Figure S3. (cont.)**

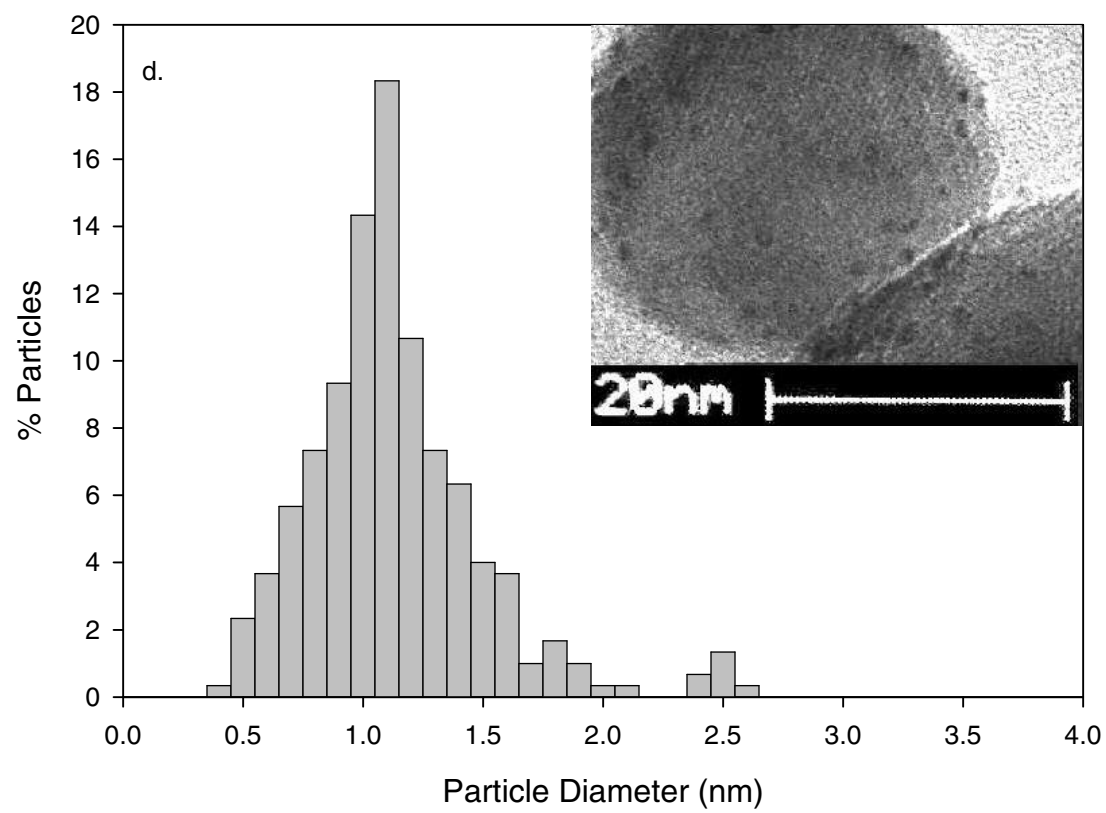

**Figure S3. (cont.)**



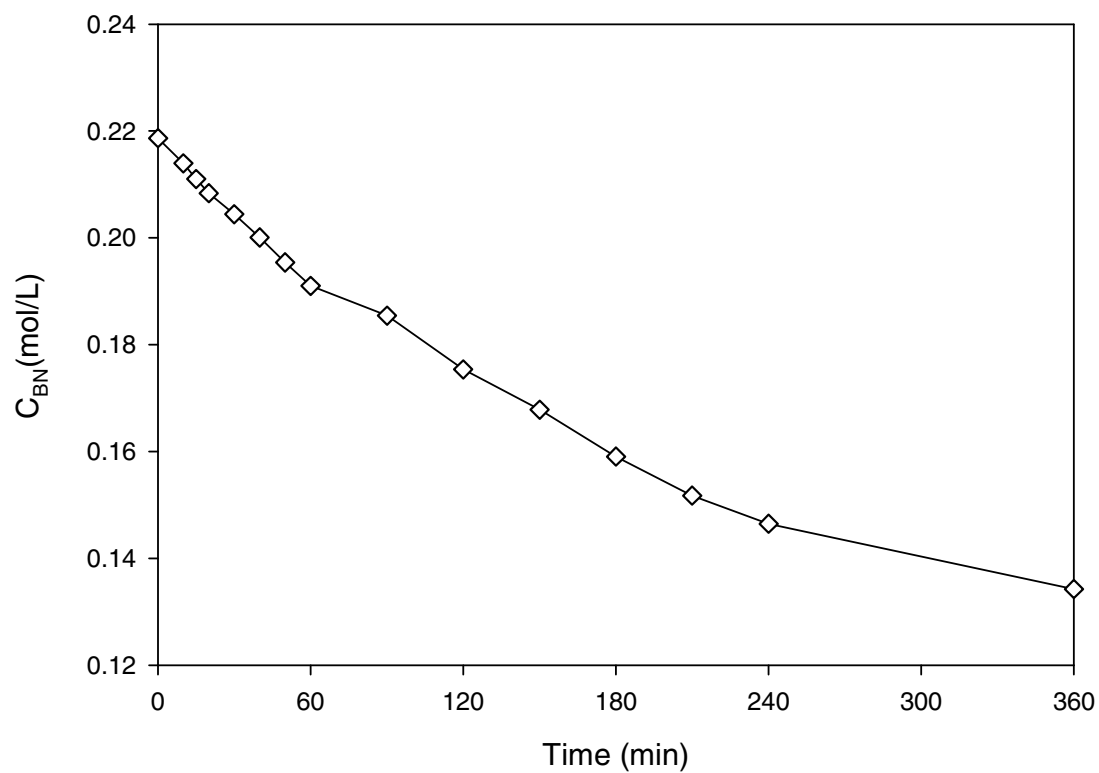

Initial rate was calculated by fitting the benzonitrile concentration versus time with an appropriate polynomial during the initial stages of the reaction and determining  $-\left(\frac{dC_{BN}}{dt}\right)_{t=0}$ .

Selectivity toward dibenzylamine (DBA) was calculated at 20 % benzonitrile conversion using the following formula:

$$S_{DBA} = \frac{n_{DBA}}{\sum v_i n_i}$$

where,  $n_i$  is the moles of the product,  $v_i$  is the stoichiometric number of the product

**Figure S4.**
